# Supplementary material for: Synthesis of Graphite Oxide with Different Surface Oxygen Contents Assisted Microwave Radiation
Source: PubMed Central journal article supplement (PMC5853737; doi:10.3390/nano8020106), 2018-02-13
Supplement: nanomaterials-08-00106-s001.pdf [file nanomaterials-08-00106-s001.pdf]

## Supplementary material

# Synthesis of Graphite Oxide with Different Surface Oxygen Contents Assisted Microwave Radiation

Adriana Ibarra-Hernández <sup>1</sup>, Alejandro Vega-Rios <sup>1</sup> and Velia Osuna <sup>2,\*</sup>

<sup>1</sup> Centro de Investigación en Materiales Avanzados, S.C., Miguel de Cervantes No. 120, Chihuahua 31136, Chihuahua., Mexico; adriibarra26@gmail.com (A.I.-H.); alejandro.vega@cimav.edu.mx (A.V.-R.)

<sup>2</sup> Consejo Nacional de Ciencia y Tecnología (CONACYT)-Centro de Investigación en Materiales Avanzados, S.C., Miguel de Cervantes No. 120., Chihuahua 31136, Chihuahua., Mexico

\* Correspondence: velia.osuna@cimav.edu.mx; Tel.: +52-614-439-4832

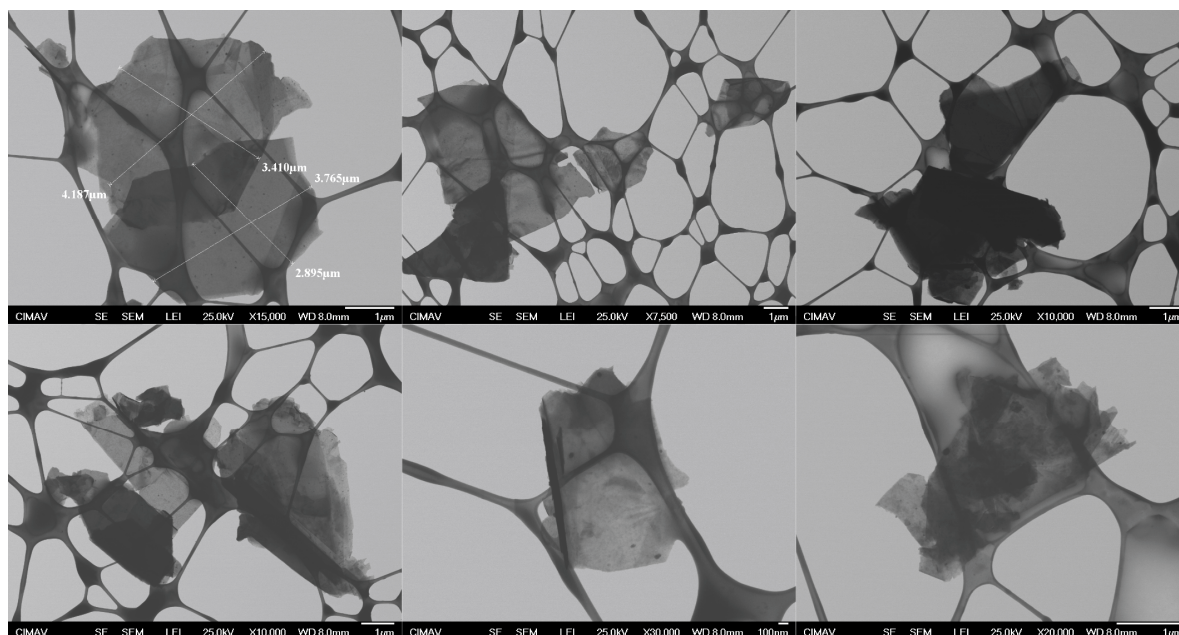

Figure S1. FESEM micrographs of ground graphite.

Table S1. Results of the diffraction patterns and interplanar distance of all methods.

| Sample   | Peak 1 | d (Å) | Peak 2* | d (Å) | Peak 3* | d (Å) | Peak 4 | d (Å) |
|----------|--------|-------|---------|-------|---------|-------|--------|-------|
| Method A |        |       |         |       |         |       |        |       |
| cGO      | 11.38  | 7.81  | —       | —     | —       | —     | 26.50  | 3.34  |
| Method B |        |       |         |       |         |       |        |       |
| B1       | 10.85  | 8.20  | 25.30   | 3.60  | 26.10   | 3.50  | 26.80  | 3.41  |
| B2       | 11.80  | 7.53  | 25.50   | 3.57  | 25.90   | 3.53  | 26.40  | 3.46  |
| B3       | 11.70  | 7.60  | 25.55   | 3.57  | —       | —     | 26.60  | 3.44  |
| Method C |        |       |         |       |         |       |        |       |
| C1       | 10.60  | 8.38  | —       | —     | —       | —     | —      | —     |
| C2       | 10.60  | 8.38  | —       | —     | —       | —     | —      | —     |
| Method D |        |       |         |       |         |       |        |       |
| D1       | 10.4   | 8.53  | —       | —     | —       | —     | —      | —     |
| D2       | —      | —     | 25.80   | 3.54  | 26.10   | 3.50  | 26.50  | 3.45  |

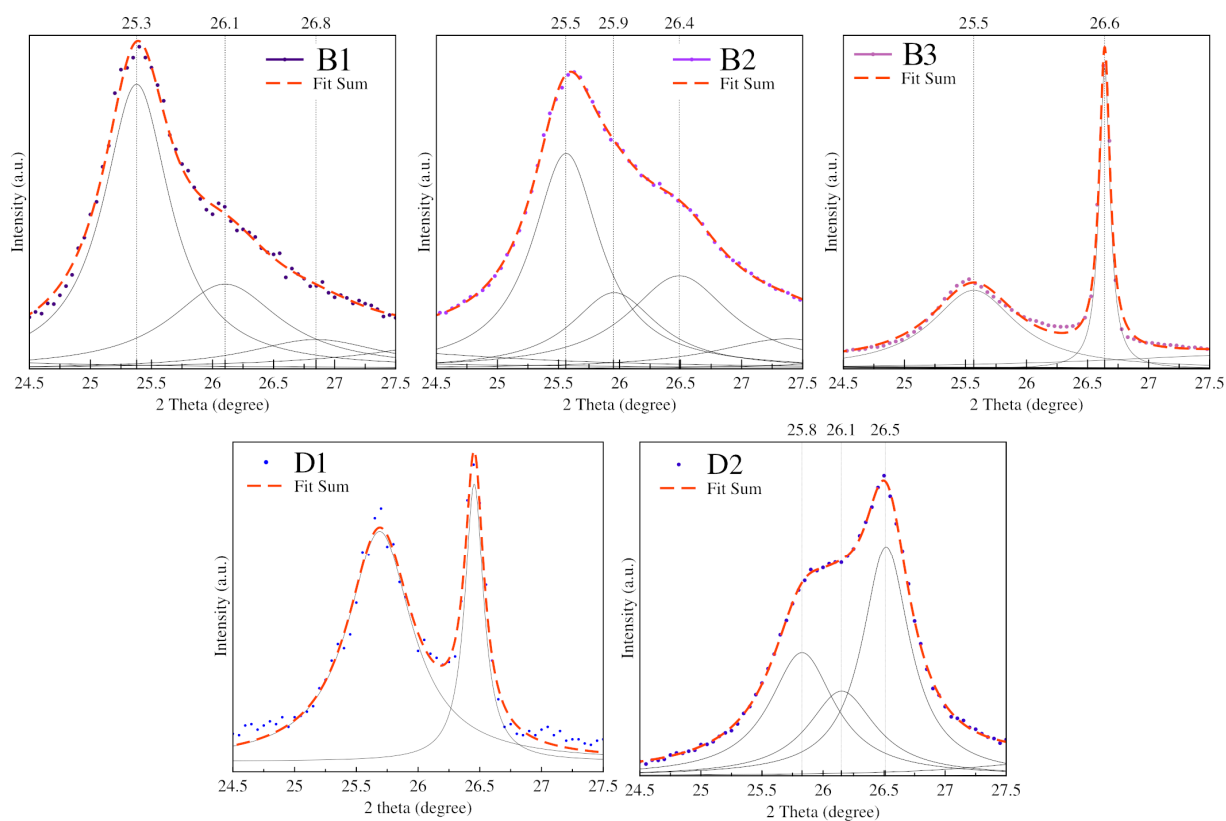

**Figure S2.** Deconvolution of the X-ray diffraction patterns in the range 24–27° from samples B1, B2, B3 (methodology B) and the samples D1, D2 (methodology D).

### Deconvolution

The deconvolution of the diffractograms and Raman spectra were made using the software MagicPlot ver. 2.7.2 with 10000 interactions. Red line indicates a summation of curves deconvolution (Fit Sum), and solid black line represents the original experimental intensity from the background. Dotted black lines represent the assigned curves.

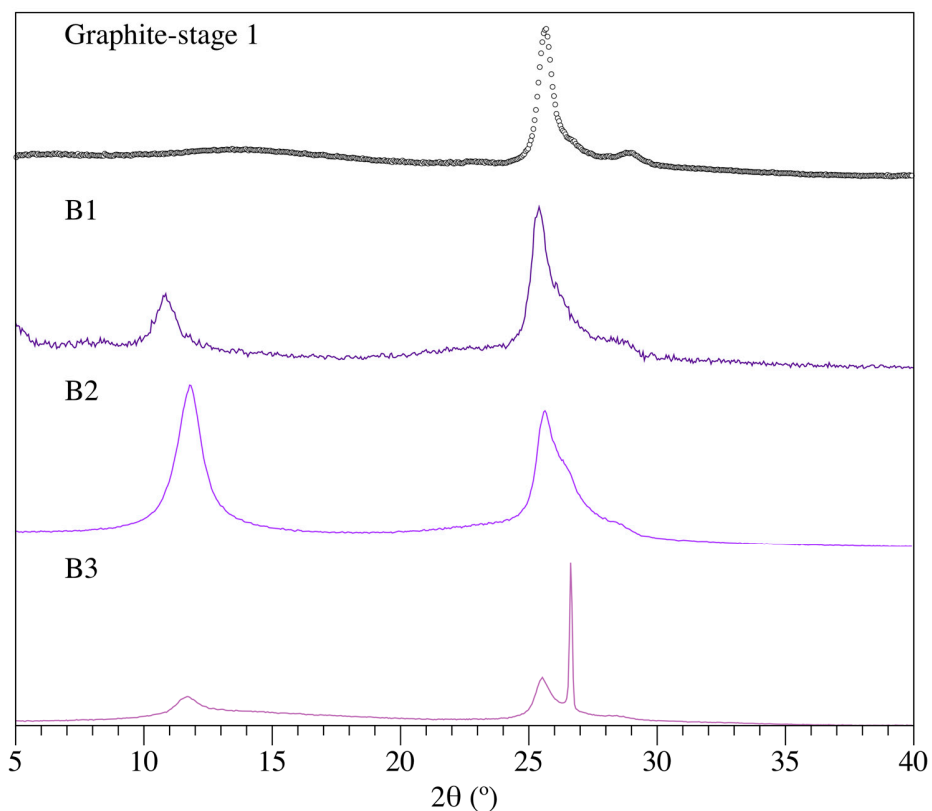

**Figure S3.** X-ray diffraction patterns of Graphite-stage 1 compared with B1, B2, B3.

**Table S2.** Water conductivity before and after microwave radiation\*.

| Sample | Description | Temperature (°C) |       | Conductivity (μS) |       | pH     |       |
|--------|-------------|------------------|-------|-------------------|-------|--------|-------|
|        |             | Before           | After | Before            | After | Before | After |
| Water  | Water       | 17.5             | 17.6  | 9                 | 13    | 7      | 7     |
| GFT    | Water + GF  | 22.1             | 22.0  |                   | 57    | 7      | 7     |
| GTMW   | Water + GG  |                  | 21.9  |                   | 45    | 7      | 7     |
| GNT    | Water + GN  |                  | 22.1  |                   | 53    | 7      | 7     |

\* The conditions of microwave radiation were at t=20 min and T=80°C.

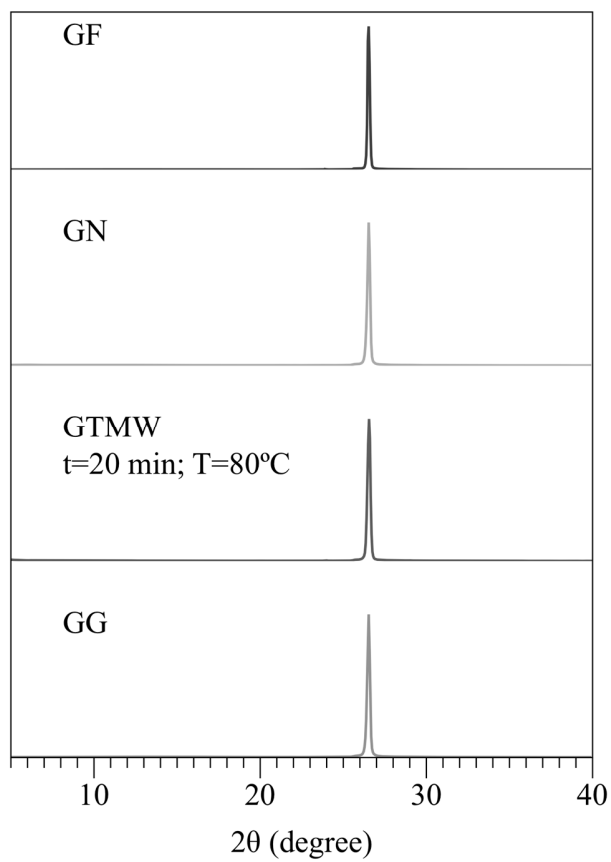

**Figure S4.** X-ray diffraction pattern of the ground graphite (GG), graphite treated with MW (GTMW), natural graphite (GN) and flakes graphite (GF).

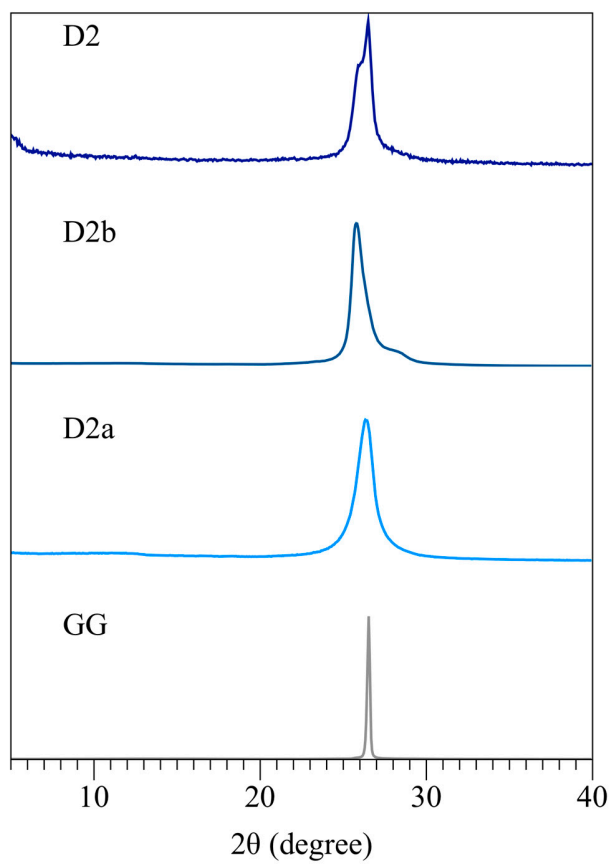

**Figure S5.** X-ray diffraction pattern from samples D2; D2b; D2a; GG.

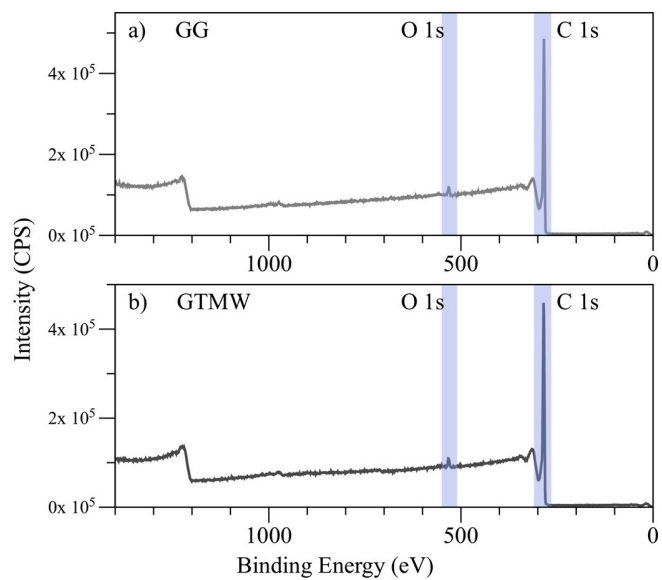

**Figure S6.** XPS survey spectrum of GG and GTMW.

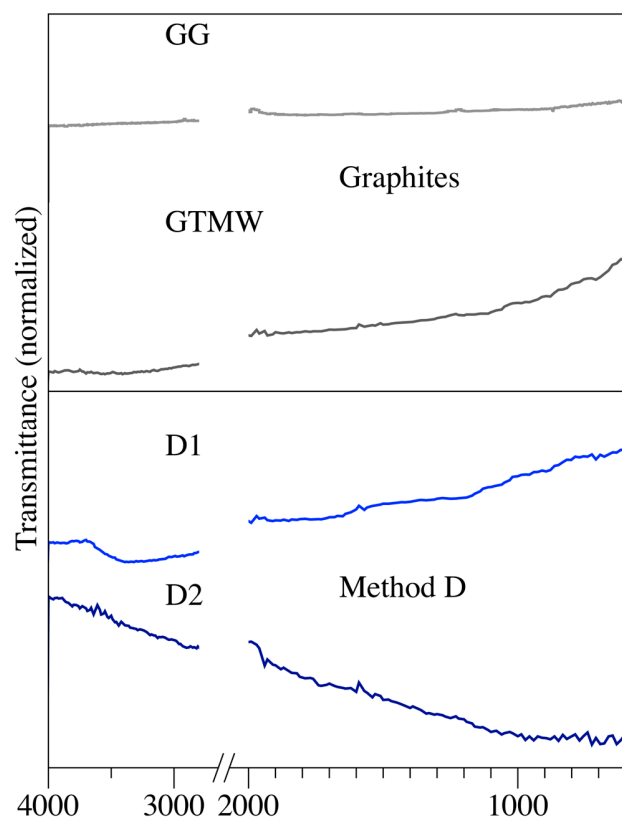

**Figure S7.** FTIR spectrum of graphites (GG, GTMW) and the samples D1, D2 (methodology D).

**Table S3.** Peak ratio intensities of  $I_D/I_G$  and  $I_{2D}/I_G$ .

| Sample | $I_D/I_G$ | $I_{2D}/I_G$ |
|--------|-----------|--------------|
| cGO    | 1.12      | 0.10         |
| B1     | 0.79      | 0.34         |
| B2     | 1.10      | 0.14         |
| B3     | 0.99      | 0.22         |
| C1     | 1.20      | 0.14         |
| C2     | 1.07      | 0.13         |
| D1     | 0.10      | 0.37         |
| D2     | 0.20      | 0.42         |

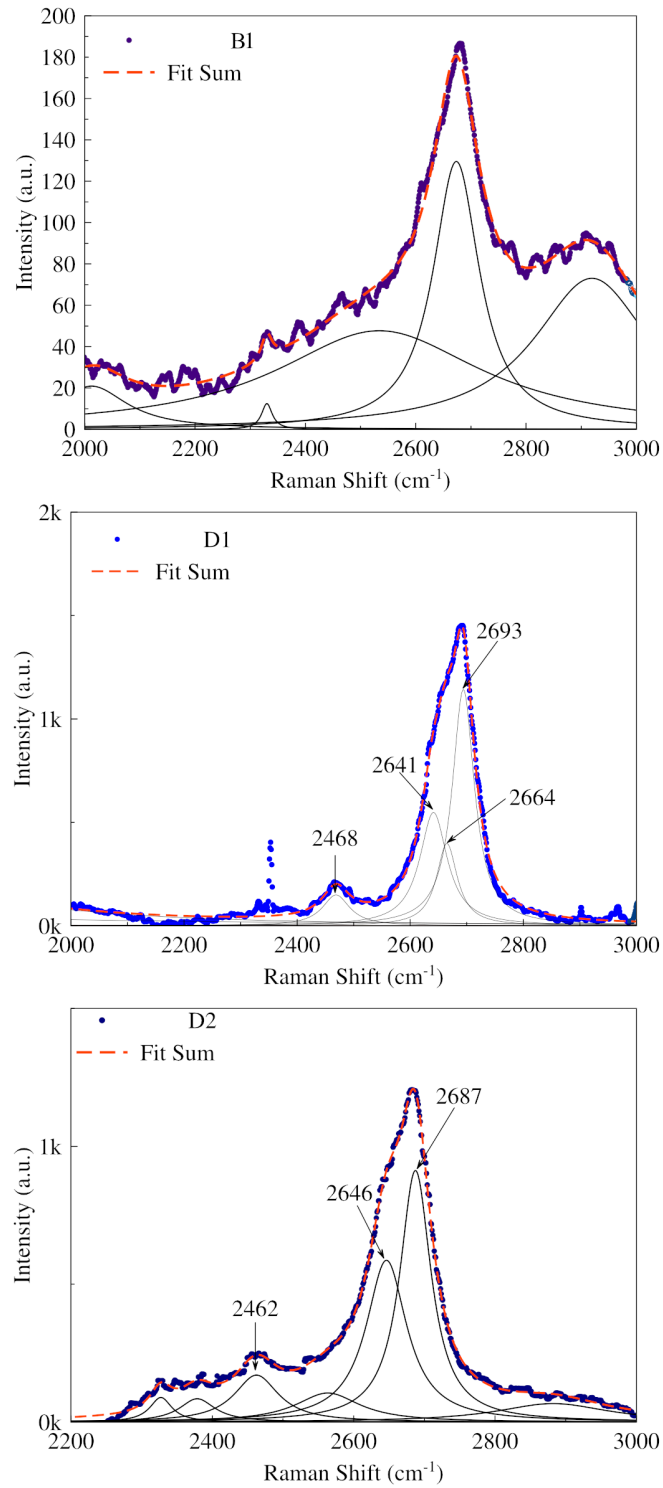

**Figure S8.** Raman spectra deconvolution, band 2D, from samples B1, D1 and D2.

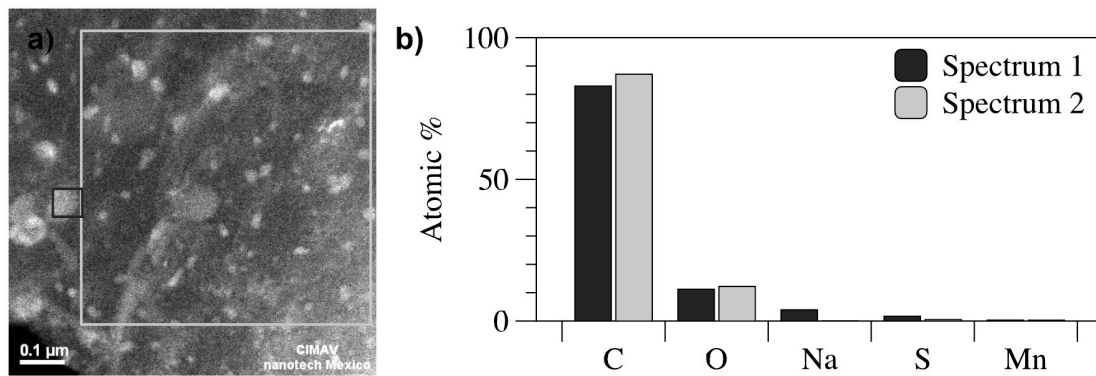

**Figure S9.** (a) High-resolution TEM micrograph in STEM mode analyzing two areas of the sample D2; (b) EDS elemental analysis of the micrograph.
